# Supplementary material for: COX4-like, a Nuclear-Encoded Mitochondrial Gene Duplicate, Is Essential for Male Fertility in Drosophila melanogaster
Source: MDPI journal article supplement (doi:10.3390/genes13030424), 2022-02-25
Supplement: s1 [file s1]

**Supplementary Table S1.** Detailed information about the strains used in this study.

| Strain name                                         | Genotype                                                            | Stock Center                         |
|-----------------------------------------------------|---------------------------------------------------------------------|--------------------------------------|
| <i>COX4L-RNAi /CG10396-RNAi</i><br>(ID # 1482)      | <i>w<sup>1118</sup>; P[GD414]v1482</i>                              | VDRC                                 |
| <i>COX4L-RNAi /CG10396-RNAi</i><br>(ID # 106700)    | <i>w<sup>1118</sup>; P[KK102531]v106700</i>                         | VDRC                                 |
| <i>Nos Cas9 attp2</i>                               | <i>y,sc,v; +/+; nos-Cas9</i>                                        | Rainbow<br>Transgenic Flies,<br>Inc. |
| <i>Actin5C-Gal4</i><br>(ID # 4414)                  | <i>y[1] w[*]; P{w[+mC]=Act5C-<br/>GAL4}25FO1/CyO, y[+]</i>          | BDSC                                 |
| <i>bam-Gal4</i>                                     | <i>y[1] w[*] P{w[+mC]=bam-GAL4:VP16}1</i>                           | BDSC                                 |
| <i>nos-Gal4</i><br>(ID # 25394)                     | <i>w[*]; Pen[D14]/CyO; P{w[+mC]=GAL4-<br/>nos.NGT}9/TM6B, Tb[+]</i> | BDSC                                 |
| <i>w<sup>1118</sup> /GD control</i><br>(ID # 60000) | <i>w[1118]</i>                                                      | VDRC                                 |
| <i>w<sup>1118</sup> /KK control</i><br>(ID # 60100) | <i>y,w[1118];P{attP,y[+],w[3`]}</i>                                 | VDRC                                 |

**Supplementary Table S2.** gRNA primers and homologous arm gene blocks (5'-3') designed to produce the *COX4L* knockout and primers to confirm the *COX4L* knockout via PCR.

|                                        |                                                                                                                                                                                                                                                                                                                                                                                                                                                                                                                                                                                                                                                                                                                                                                                                                                                                                                                                                                                                                             |
|----------------------------------------|-----------------------------------------------------------------------------------------------------------------------------------------------------------------------------------------------------------------------------------------------------------------------------------------------------------------------------------------------------------------------------------------------------------------------------------------------------------------------------------------------------------------------------------------------------------------------------------------------------------------------------------------------------------------------------------------------------------------------------------------------------------------------------------------------------------------------------------------------------------------------------------------------------------------------------------------------------------------------------------------------------------------------------|
| COX4L guide 1 sense                    | CTTCGTGTAATTATGCGCAAGCACT                                                                                                                                                                                                                                                                                                                                                                                                                                                                                                                                                                                                                                                                                                                                                                                                                                                                                                                                                                                                   |
| COX4L guide 1 antisense                | AAACAGTGCTTGCGCATAATTACAC                                                                                                                                                                                                                                                                                                                                                                                                                                                                                                                                                                                                                                                                                                                                                                                                                                                                                                                                                                                                   |
| COX4L homologous arm 1<br><i>EcoRI</i> | GGGTGTCGCCCTTCGCTGAAGCAGGTGGAATgcttttcgctggcc<br>atagctctcgtggccctgcagccactctggctcgtgccaatatagatgataacctgccaa<br>ttaacactgagggacggattgatttgatttcggctcgaagaggcaatttggggaaaaa<br>accgtaaaaataggaaatatctaaagaatagctcgacaattttcacaattacaaattt<br>aattattaaataattatttgaaagttttaaaattttgtttcggaattgtttattttgtgtttttt<br>ttcatgatatttacttttaagagattggcaaatgcttcattctctaagtagagcgagattgtctt<br>taatgtcttatattttctaaagtatagcttttttaaaattcttaagggtgggccaacaatgttatt<br>gcgatttaaaaattttgaaaaaagtcaactagttgattcttaaactttatcaaaatttcagat<br>attgaaaactggacgtgggcaaaaaaaataattattgggcaaacagttctagatttcaa<br>aaattcgattttccgaaccagcttcttgagctgacatgacagccattttaaaaatgtttg<br>ttttttttgtgacaaaaaattgatcttcataattttgccacgccttaacaattttaagaa<br>gaagtaaaatttcagactatcttagtgcacgaagagtgaattcagaacttaaaaa<br>gtacatctagttttagataaggaaactgtcatattttttgtattcaacaacagactaga<br>gaaatttcattttcattcgacacgagcaacacaactgtcgaatttccggatgaagtaaaa<br>aacaaaaaattgaaaagcgagtataaaaataaaatacactcaagggtacagttacgacc<br>aagtAATTCTTGCATGCTAGCGGCCGCGGACATAT |
| COX4L guide 2 sense                    | CTTCGTTCTCTCGGTAGCACCATT                                                                                                                                                                                                                                                                                                                                                                                                                                                                                                                                                                                                                                                                                                                                                                                                                                                                                                                                                                                                    |
| COX4L guide 2 antisense                | AAACAATGGTGCTACCGAGAGAAC                                                                                                                                                                                                                                                                                                                                                                                                                                                                                                                                                                                                                                                                                                                                                                                                                                                                                                                                                                                                    |

|                                                            |                                                                                                                                                                                                                                                                                                                                                                                                                                                                                                                                                                                                                                                                                                                                                                                                                                                                                                                                                                                                                              |
|------------------------------------------------------------|------------------------------------------------------------------------------------------------------------------------------------------------------------------------------------------------------------------------------------------------------------------------------------------------------------------------------------------------------------------------------------------------------------------------------------------------------------------------------------------------------------------------------------------------------------------------------------------------------------------------------------------------------------------------------------------------------------------------------------------------------------------------------------------------------------------------------------------------------------------------------------------------------------------------------------------------------------------------------------------------------------------------------|
| <p>COX4L homologous arm 2</p> <p>XhoI</p>                  | <p>TGCATAAGGCGCGCCTAGGCCTTCTGCAGCgggtgctaccgagag</p> <p>aacaagtggaagtagcacatcaacacgatgattttccgtaaactatgtacagaaacgta</p> <p>actagcaaaaatacaattcaacagcaaagtcgcttgccatttgatcggtacgtgctgaatc</p> <p>gggcaaatacccaatatctatagattttgtgtctctagctgtgtaactcgactatagcatttc</p> <p>ctcccgttgaaattaggggtgtgtatgtaaattctcagacacaacttaatttagtgaatttta</p> <p>gtccacgatagatatgttaagcattgaaatcggtgcctgtgttccttgactagtacacgtac</p> <p>actgcgcgatcatcagattagcgccctccctgtatgccaccgtttcatcttatgatctgtatttc</p> <p>cattgcacgaaaatctatcaatgttattgtttttgttactgatattccctctctcttgagaata</p> <p>aaaaagaggttgagagaagaacagttatctcttttattctgctttgtgtaactttggcgcaa</p> <p>aattgaacacgtgtttgcatcatcagattagcgccccagtttgaatatcggtccataattt</p> <p>gaaaggtaggacaacaaaattttattaaaaacaaggaatcttatagaaaaaactataa</p> <p>ttgtggcaataaccgtgtcgttaccgcggcagattgcaggtccatacttcgaattgcttcca</p> <p>attcccacgactcctccgcaaaaattcgagaaaaaagtggtataagcgcgagcaaatac</p> <p>gacgattccaagggtagcttagaaagctaaacatttaaagcacaacgaactaacGC</p> <p>TCGAGGCTCTTCCGTCAATCGAGTTCAAG</p> |
| <p>Forward primer to confirm the</p> <p>COX4L knockout</p> | <p>GTACACTGCCGTGCGAAATGAG</p>                                                                                                                                                                                                                                                                                                                                                                                                                                                                                                                                                                                                                                                                                                                                                                                                                                                                                                                                                                                                |
| <p>Reverse primer to confirm the</p> <p>COX4L knockout</p> | <p>GGGTTTCATTTGCAGCTGGATG</p>                                                                                                                                                                                                                                                                                                                                                                                                                                                                                                                                                                                                                                                                                                                                                                                                                                                                                                                                                                                                |

**Supplementary Table S3.** gRNA primers and homologous arm gene blocks (5'-3')

designed to produce the COX4 knockout and primers to confirm the COX4 knock-out via PCR.

|                                       |                                                                                                                                                                                                                                                                                                                                                                                                                                                                                                                                                                                                                                                                                                                                                                                                                                                                                                                                                                                                                                                  |
|---------------------------------------|--------------------------------------------------------------------------------------------------------------------------------------------------------------------------------------------------------------------------------------------------------------------------------------------------------------------------------------------------------------------------------------------------------------------------------------------------------------------------------------------------------------------------------------------------------------------------------------------------------------------------------------------------------------------------------------------------------------------------------------------------------------------------------------------------------------------------------------------------------------------------------------------------------------------------------------------------------------------------------------------------------------------------------------------------|
| COX4 guide 1 sense                    | CTTCGTATATTCAATCGCTAGCAAT                                                                                                                                                                                                                                                                                                                                                                                                                                                                                                                                                                                                                                                                                                                                                                                                                                                                                                                                                                                                                        |
| COX4 guide 1 antisense                | AAACATTGCTAGCGATTGAATATAC                                                                                                                                                                                                                                                                                                                                                                                                                                                                                                                                                                                                                                                                                                                                                                                                                                                                                                                                                                                                                        |
| COX4 homologous arm 1<br><i>EcoRI</i> | GGGTGTCGCCCTTCGCTGAAGCAGGTGGAATgcgcacttgtaa<br>aatgcaaattgtcctagccacaaactgaacctgataacgaagcactaccatcccaaaa<br>agcaaggaccccggtgcgttccgaaaaacccaaatcttgagaaaaggaaacttca<br>ctaactgaaatgttacagagataagacgagtgaattcattttgtacatatagatgaaaa<br>ctaaccccaagtccccctatgcttaagtgtgaatctgaccgacggtctagactttttat<br>cctttatcccagcccagagtcggcggatcatatgaattaaatcgcaactaatcctaact<br>ctactgtaaattagctataagttttgctactaccaatttacaagatgtatagttgaaggaa<br>aaagctttcactttagtttaattatttgcgtaattatcattaaatattgttacaaacatattgcat<br>atttataaagcccaataaagcaaaaataccattaacatatattattatgccaagcggcgctta<br>aacacaggaatacgcgaaagtgaatacgtaatgccccatcctcgataaaatagctaa<br>atttccgaactccagatccctatcgaaagataatcttatgtaatacaaaactcaagcagca<br>aactatatgatacgataaagcaaattatgtgtctctgtctaatttaaattgtgtgcatttatgag<br>atatgacatcaaatcaaaaataaataatataatcgacaataattgtttgtgtgttctcttc<br>tcgcggacagactacaaaaagaatgtgaaataccaaaccaaataatttcaccatgctgc<br>gaaataaaaataaaacataatagttgcccttatttgctgtttctttatattaatatttagatttaa<br>ataccccgccgaattccgattAATTCTTGCATGCTAGCGGCCGCGGA<br>CATAT |
| COX4 guide 2 sense                    | CTTCGCTCTTAAACGGATCATTG                                                                                                                                                                                                                                                                                                                                                                                                                                                                                                                                                                                                                                                                                                                                                                                                                                                                                                                                                                                                                          |

|                                                |                                                                                                                                                                                                                                                                                                                                                                                                                                                                                                                                                                                                                                                                                                                                                                                                                                                                                                                                                                                                                                  |
|------------------------------------------------|----------------------------------------------------------------------------------------------------------------------------------------------------------------------------------------------------------------------------------------------------------------------------------------------------------------------------------------------------------------------------------------------------------------------------------------------------------------------------------------------------------------------------------------------------------------------------------------------------------------------------------------------------------------------------------------------------------------------------------------------------------------------------------------------------------------------------------------------------------------------------------------------------------------------------------------------------------------------------------------------------------------------------------|
| COX4 guide 2 antisense                         | AAACCAATGATCCGTTTTAAGAGC                                                                                                                                                                                                                                                                                                                                                                                                                                                                                                                                                                                                                                                                                                                                                                                                                                                                                                                                                                                                         |
| COX4 homologous arm 2<br><i>XhoI</i>           | TGCATAAGGCGCGCCTAGGCCTTCTGCAGCtgatccgtttaagag<br>caatgattgttattcgatttattaacagaccttttagtgtagattacaaacttttcgttactaa<br>aatcgccacaggcatagccaatttaattaccacttagtgagaccttttagcactcttatgtct<br>catgttccggctgttcgattttgaacctcatgaacaaggatctgcaaggctccaaggca<br>tttggttcttggaattccctttcaaacatgcggccgaatcttaagatcaatggttcagtt<br>ccggcggtatcattgctttcttttcggctcctaaaaaggcggttcaaaggcattgccag<br>acatataggcgaacactacttacacagctccctttttatcacctcttcaggatctggaca<br>accgtttgaatgtcccaaataatctgtactgtctttgtagaaatttcaccgtcaaagaat<br>aacttcagttcgtgtcagttatattcttcttcgacccattcctccagctctgccgtctcttttg<br>gtaggcgtccgagctctgctgaaaagaagtcaggcattcctgatctcagagcattcat<br>acttgatgcagatgatgcacctacctccagttcgaaatatccctagctgtctgcttcattcttt<br>ttaaattgtcctgatctgtgttgaaagtcttcttcttctcctttgcaactgtcgcccttggttcg<br>gcatctcggttaaagctattgaaagcgaaagggttggtgccattcgaaagtgtatatatcct<br>tcagctcgatcgaatctgtatcttactgttttgccaatcgatccatcgatggaggcctgt<br>gcagattgtgtgctcggagatgacgctgtctttccatctgggtgtggttctggttaccGCT<br>CGAGGCTCTTCCGTCAATCGAGTTCAAG |
| Forward primer to confirm the<br>COX4 knockout | ACTACTCAACAGTGCTGTGCT                                                                                                                                                                                                                                                                                                                                                                                                                                                                                                                                                                                                                                                                                                                                                                                                                                                                                                                                                                                                            |
| Reverse primer to confirm the<br>COX4 knockout | GTGTAGTCCTCGTTGTGGGA                                                                                                                                                                                                                                                                                                                                                                                                                                                                                                                                                                                                                                                                                                                                                                                                                                                                                                                                                                                                             |

**Supplementary Table S4.** Evolutionary rate covariation (ERC) values calculated using the ERC Analysis Web server from Pittsburg University ([https://csb.pitt.edu/erc\\_analysis](https://csb.pitt.edu/erc_analysis)) [1-3]. The presence of testis-enriched N-mt gene duplicates involved in OXPHOS complexes is retrieved from the *Drosophila* sperm proteome project (DmSP-II) [4].

| Duplicate Gene ID | Duplicate Gene Name | DSP             | DSP Absent (Query COX4) | DSP Present (Query COX4) | DSP Absent (Query COX4L) | DSP Present (Query COX4L) |
|-------------------|---------------------|-----------------|-------------------------|--------------------------|--------------------------|---------------------------|
| CG6485            | <i>ND-24L</i>       | DmSP-II         | -                       | 0.091                    | -                        | 0.371                     |
| CG8102            | <i>ND-51L2</i>      | DmSP-I          | -                       | -0.289                   | -                        | 0.424                     |
| CG2014            | <i>ND-20L</i>       | X               | -0.073                  | -                        | 0.11                     | -                         |
| CG11913           | <i>ND-49L</i>       | DmSP-I          | -                       | 0.176                    | -                        | 0.023                     |
| CG5718            | <i>SdhAL</i>        | DmSP-I, DmSP-II | -                       | 0.151                    | -                        | 0.554                     |
| CG14508           | <i>Cyt-c1L</i>      | DmSP-I, DmSP-II | -                       | 0.285                    | -                        | 0.275                     |
| CG10396           | <i>COX4L</i>        | DmSP-I          | -                       | 0.348                    | -                        | N/A                       |
| CG5389            | <i>ATPsynbetaL</i>  | DmSP-I, DmSP-II | -                       | 0.395                    | -                        | 0                         |
| CG18418           | <i>CG18418</i>      | X               | 0.496                   | -                        | 0.4                      | -                         |
| CG4701            | <i>CG4701</i>       | X               | 0.612                   | -                        | -0.056                   | -                         |
| CG14740           | <i>CG14740</i>      | DmSP-I, DmSP-II | -                       | 0.303                    | -                        | 0.829                     |
| CG6255            | <i>Scsa2</i>        | DmSP-I, DmSP-II | -                       | 0.517                    | -                        | 0.215                     |
| CG33791           | <i>CG33791</i>      | DmSP-II         | -                       | -0.08                    | -                        | 0.527                     |
| CG33092           | <i>P5CDh2</i>       | X               | 0.553                   | -                        | 0.343                    | -                         |
| CG11401           | <i>Trxr-2</i>       | X               | 0.59                    | -                        | 0.475                    | -                         |
| CG9920            | <i>BEST:GH20473</i> | X               | -0.046                  | -                        | 0.166                    | -                         |
| Average           |                     |                 | 0.354                   | 0.1897                   | 0.24                     | 0.357                     |

**Supplementary Table S5.** One-ratio branch model analysis with a null model assuming that each respective group of sequences is evolving at the same rate (one-ratio model) in addition to an alternative model in which the  $dN/dS$  ratio was fixed to  $dN/dS = 1$ , conducted for COX4 (A) and COX4L (B). **C)** Two-ratio branch model analysis for the comparison of COX4 and COX4L evolution under different evolutionary constraints. Significantly higher rate is shown in red.

**A.**

|             |                         |               |          |
|-------------|-------------------------|---------------|----------|
| <b>COX4</b> | Branch model- One Ratio | omega (dN/dS) | 0.06967  |
|             |                         | lnL           | -3785.3  |
|             |                         | np            | 41       |
|             | omega =1                | omega (dN/dS) | 1        |
|             |                         | lnL           | -4273.55 |
|             |                         | np            | 40       |
|             | Pvalue:                 | <b>0</b>      |          |

**B.**

|              |                         |               |          |
|--------------|-------------------------|---------------|----------|
| <b>COX4L</b> | Branch model- One Ratio | omega (dN/dS) | 0.10732  |
|              |                         | lnL           | -4755.83 |
|              |                         | np            | 43       |
|              | omega =1                | omega (dN/dS) | 1        |
|              |                         | lnL           | -5221.51 |
|              |                         | np            | 42       |
|              | Pvalue:                 | <b>0</b>      |          |

**C.**

|                   | logL; 1 rate | Single rate | logL; 2 rates | COX4 rate | COX4L rate   | 2deltaL~X2 | d.f. | P             |
|-------------------|--------------|-------------|---------------|-----------|--------------|------------|------|---------------|
| <b>COX4-COX4L</b> | -4614.928441 | 0.1006      | -4606.91099   | 0.0606    | <b>0.125</b> | 16.034902  | 1    | <b>0.0001</b> |

**Supplementary Table S6.** Physical protein interaction analysis of COX4L with STRING (V 11.5)

**COX4** Cytochrome-c oxidase activity. It is involved in the biological process described with: negative regulation of neuroblast proliferation; cell proliferation; mitochondrial electron transport, cytochrome c to oxygen; mitotic cell cycle; Golgi organization (182 aa)

**Predicted Functional Partners:**

| Protein | Description                                                                                                                                     | Neighborhood | Gene Fusion | Cooccurrence | Coexpression | Experiments | Databases | Textmining | [Homology] | Score |
|---------|-------------------------------------------------------------------------------------------------------------------------------------------------|--------------|-------------|--------------|--------------|-------------|-----------|------------|------------|-------|
| levy    | Levy, isoform A; Enzyme regulator activity; cytochrome-c oxidase activity. It is involved in the biological process described with...           | ●            | ●           | ●            | ●            | ●           | ●         | ●          | ●          | 0.999 |
| COX6B   | Cytochrome c oxidase subunit 6b; This protein is one of the nuclear-coded polypeptide chains of cytochrome c oxidase, the term...               | ●            | ●           | ●            | ●            | ●           | ●         | ●          | ●          | 0.999 |
| COX5B   | Cytochrome c oxidase subunit 5b; This protein is involved in the biological process described with: mitochondrial electron transport, cytoch... | ●            | ●           | ●            | ●            | ●           | ●         | ●          | ●          | 0.999 |
| COX5A   | Cytochrome c oxidase subunit 5A, mitochondrial; This is the heme A-containing chain of cytochrome c oxidase, the terminal o...                  | ●            | ●           | ●            | ●            | ●           | ●         | ●          | ●          | 0.999 |
| ATPsynG | Hydrogen-exporting ATPase activity, phosphorylative mechanism. It is involved in the biological process described with: proto...                | ●            | ●           | ●            | ●            | ●           | ●         | ●          | ●          | 0.999 |
| cype    | Cytochrome (Cype) is a cytochrome c oxidase subunit Vlc homolog acting as an enhancer of dpp pathway phenotypes. Cype is in...                  | ●            | ●           | ●            | ●            | ●           | ●         | ●          | ●          | 0.999 |
| UQCRC1  | Ubiquinol-cytochrome-c reductase activity; metal ion binding; metalloendopeptidase activity. It is involved in the biological pro...            | ●            | ●           | ●            | ●            | ●           | ●         | ●          | ●          | 0.995 |
| Cyt-c1  | Cytochrome c1, isoform A; Electron transporter, transferring electrons within CoQH2-cytochrome c reductase complex activit...                   | ●            | ●           | ●            | ●            | ●           | ●         | ●          | ●          | 0.993 |
| COX7A   | Cytochrome c oxidase subunit 7A, mitochondrial; This protein is one of the nuclear-coded polypeptide chains of cytochrome ...                   | ●            | ●           | ●            | ●            | ●           | ●         | ●          | ●          | 0.993 |
| RFeSP   | Rieske iron-sulfur protein                                                                                                                      | ●            | ●           | ●            | ●            | ●           | ●         | ●          | ●          | 0.991 |

**COX4L** Cytochrome c oxidase subunit 4-like, isoform a; Cytochrome-c oxidase activity. It is involved in the biological process described with: mitochondrial electron transport, cytochrome c to oxygen (176 aa)

**Predicted Functional Partners:**

| Protein   | Description                                                                                                                         | Neighborhood | Gene Fusion | Cooccurrence | Coexpression | Experiments | Databases | Textmining | [Homology] | Score |
|-----------|-------------------------------------------------------------------------------------------------------------------------------------|--------------|-------------|--------------|--------------|-------------|-----------|------------|------------|-------|
| COX5B     | Cytochrome c oxidase subunit 5b, isoform a; Cytochrome-c oxidase activity. It is involved in the biological process described...    | ●            | ●           | ●            | ●            | ●           | ●         | ●          | ●          | 0.994 |
| COX5A     | Cytochrome c oxidase subunit 5A, mitochondrial; This is the heme A-containing chain of cytochrome c oxidase, the terminal ...       | ●            | ●           | ●            | ●            | ●           | ●         | ●          | ●          | 0.993 |
| RFeSP     | Ubiquinol-cytochrome c reductase iron-sulfur subunit; Component of the ubiquinol-cytochrome c reductase complex (compl...           | ●            | ●           | ●            | ●            | ●           | ●         | ●          | ●          | 0.991 |
| levy      | Levy, isoform A; Enzyme regulator activity; cytochrome-c oxidase activity. It is involved in the biological process described wi... | ●            | ●           | ●            | ●            | ●           | ●         | ●          | ●          | 0.988 |
| COX7C     | Cytochrome c oxidase subunit 7c, isoform a; Cytochrome-c oxidase activity. It is involved in the biological process described...    | ●            | ●           | ●            | ●            | ●           | ●         | ●          | ●          | 0.988 |
| COX6B     | Cytochrome c oxidase subunit 6b, isoform d; Cytochrome c oxidase subunit; This protein is one of the nuclear-coded polype...        | ●            | ●           | ●            | ●            | ●           | ●         | ●          | ●          | 0.987 |
| mtCol     | Cytochrome c oxidase subunit 1; Cytochrome c oxidase is the component of the respiratory chain that catalyzes the reductio...       | ●            | ●           | ●            | ●            | ●           | ●         | ●          | ●          | 0.987 |
| UQCRC-11L | Ubiquinol-cytochrome c reductase 11 kDa subunit-like, isoform b; Cytochrome b-c1 complex subunit b; This is a component ...         | ●            | ●           | ●            | ●            | ●           | ●         | ●          | ●          | 0.985 |
| UQCRC-2   | Ubiquinol-cytochrome c reductase core protein 2, isoform a; Ubiquinol-cytochrome-c reductase activity; metal ion binding. I t...    | ●            | ●           | ●            | ●            | ●           | ●         | ●          | ●          | 0.984 |
| UQCRC-Q   | Ubiquinol-cytochrome c reductase ubiquinone-binding protein, isoform a; Ubiquinone binding; ubiquinol-cytochrome-c reduct...        | ●            | ●           | ●            | ●            | ●           | ●         | ●          | ●          | 0.983 |



**Supplementary Table S7.** Average values of single cell expression of COX4 and COX4L from the spermatogonia stage to late primary spermatocytes [5].

| <b>FBgn</b>        | <b>Gene Symbol</b> | <b>G<br/>(Spermatogonia)</b> | <b>E1°<br/>(Early Primary<br/>Spermatocytes)</b> | <b>M1°<br/>(Middle Primary<br/>Spermatocytes)</b> | <b>L1°<br/>(Late Primary<br/>Spermatocytes)</b> |
|--------------------|--------------------|------------------------------|--------------------------------------------------|---------------------------------------------------|-------------------------------------------------|
| <b>FBgn0032833</b> | <b>COX4</b>        | 619.63                       | 296.1673225                                      | 213.5008964                                       | 149.4138946                                     |
| <b>FBgn0033020</b> | <b>COX4L</b>       | 167.36                       | 1214.38135                                       | 1423.794829                                       | 1959.815878                                     |

**Supplementary Table S8.** Average values ( $\pm$  SE) of viability results of *COX4L* knockdown in the soma with the *Actin5c-Gal4* driver at 25°C and 27°C.

| <b>Crosses</b>                     | <b>Average Number of Progeny at 25 °C</b> | <b>Average Number of Progeny at 27 °C</b> |
|------------------------------------|-------------------------------------------|-------------------------------------------|
| ♀COX4L-KK x ♂Actin5c-Gal4          | 91.3 $\pm$ 9.9                            | 101.3 $\pm$ 1.7                           |
| ♂COX4L-KK x ♀Actin5c-Gal4          | 86.7 $\pm$ 2.4                            | 100.7 $\pm$ 6.1                           |
| ♀COX4L-KK x ♂w <sup>1118</sup>     | 80.7 $\pm$ 11.7                           | 85.7 $\pm$ 17.8                           |
| ♂COX4L-KK x ♀w <sup>1118</sup>     | 65.0 $\pm$ 23.6                           | 87.3 $\pm$ 15.2                           |
| ♀Actin5c-Gal4 x ♂w <sup>1118</sup> | 78.7 $\pm$ 2.9                            | 79.3 $\pm$ 5.0                            |
| ♂Actin5c-Gal4 x ♀w <sup>1118</sup> | 80.0 $\pm$ 7.4                            | 82.0 $\pm$ 7.9                            |
| ♀COX4L-GD x ♂Actin5c-Gal4          | 80.0 $\pm$ 8.3                            | 64.7 $\pm$ 3.5                            |
| ♂COX4L-GD x ♀Actin5c-Gal4          | 59.3 $\pm$ 14.8                           | 72.7 $\pm$ 2.2                            |
| ♀COX4L-GD x ♂w <sup>1118</sup>     | 85.7 $\pm$ 12.4                           | 66.3 $\pm$ 5.7                            |
| ♂COX4L-GD x ♀w <sup>1118</sup>     | 70.7 $\pm$ 1.9                            | 58.3 $\pm$ 9.3                            |
| ♀Actin5c-Gal4 x ♂w <sup>1118</sup> | 67.3 $\pm$ 2.6                            | 62.0 $\pm$ 9.3                            |
| ♂Actin5c-Gal4 x ♀w <sup>1118</sup> | 72.7 $\pm$ 1.5                            | 67.3 $\pm$ 6.3                            |

**Supplementary Table S9.** Average values ( $\pm$  SE) of fertility results of *COX4L* knockdown in the germline with the *bam-Gal4* driver at 25°C and 27°C.

| Crosses                             | Average Number of Progeny at 25 °C | Average Number of Progeny at 27 °C |
|-------------------------------------|------------------------------------|------------------------------------|
| ♀ [♀KK x ♂Gal4](27c) x ♂W1118(25c)  | 69.3 $\pm$ 4.9                     | 80.3 $\pm$ 1.2                     |
| ♀[♀KK x ♂W1118] (27c) x ♂W1118(25c) | 57.0 $\pm$ 3.7                     | 68.0 $\pm$ 1.4                     |
| ♂ [♀KK x ♂Gal4](27c) x ♀W1118(25c)  | 44.7 $\pm$ 8.6                     | 51.7 $\pm$ 2.9                     |
| ♂[♀KK x ♂W1118] (27c) x ♀W1118(25c) | 72.7 $\pm$ 4.2                     | 71.0 $\pm$ 8.1                     |
| ♀[♂GD x ♀Gal4] (27c) X ♂W1118(25c)  | 69.0 $\pm$ 4.7                     | 80.3 $\pm$ 1.6                     |
| ♀[♂GD x ♀W1118](27c) X ♂W1118(25c)  | 60.3 $\pm$ 3.5                     | 65.7 $\pm$ 2.4                     |
| ♂[♂GD x ♀Gal4] (27c) X ♀W1118(25c)  | 47.0 $\pm$ 2.1                     | 59.7 $\pm$ 4.1                     |
| ♂[♂GD x ♀W1118] (27c) X ♀W1118(25c) | 62.3 $\pm$ 3.3                     | 74.0 $\pm$ 1.9                     |

**Supplementary Table S10.** Average values ( $\pm$  SE) of viability results of *COX4L* knockout strain at 25°C.

| <b>Crosses</b>         | <b>Average Number of KO/KO Progeny at 25 °C</b> | <b>Average Number of KO/CyO Progeny at 25 °C</b> |
|------------------------|-------------------------------------------------|--------------------------------------------------|
| ♀KO/CyO x ♂KO/CyO(25c) | 23.3 $\pm$ 1.8                                  | 39.7 $\pm$ 1.2                                   |
|                        | <b>Average Number of +/+ Progeny at 25 °C</b>   | <b>Average Number of +/CyO Progeny at 25 °C</b>  |
| ♀+/CyO x ♂+/CyO(25c)   | 24.3 $\pm$ 1.2                                  | 40.0 $\pm$ 1.0                                   |

**Supplementary Table S11.** Average values ( $\pm$  SE) of viability results of *COX4* and *COX4L* overexpression or ectopic expression in the soma and germline with the *Act-5C-Gal4* and *bam-Gal4* drivers at 25°C.

| Crosses                                      | Progeny without TM3 | Progeny with TM3 |
|----------------------------------------------|---------------------|------------------|
| <i>COX4</i> -ORF x <i>bam-Gal4</i>           | 42 $\pm$ 3.6        | 48.7 $\pm$ 2.3   |
| <i>COX4L</i> -ORF x <i>bam-Gal4</i>          | 50.3 $\pm$ 3.4      | 47.3 $\pm$ 1.5   |
| <i>w<sup>1118</sup></i> x <i>bam-Gal4</i>    | 48 $\pm$ 5.8        | 46.7 $\pm$ 2     |
| Crosses                                      | Progeny without CyO | Progeny with CyO |
| <i>COX4</i> -ORF x <i>Act-5C-Gal4</i>        | 47 $\pm$ 0.6        | 44 $\pm$ 2       |
| <i>COX4L</i> -ORF x <i>Act-5C-Gal4</i>       | 0                   | 48.3 $\pm$ 1.8   |
| <i>w<sup>1118</sup></i> x <i>Act-5C-Gal4</i> | 49.3 $\pm$ 2.8      | 44.3 $\pm$ 4.4   |

**Supplementary Table S12.** Average values ( $\pm$  SE) of fertility results of COX4 and COX4L overexpression in the germline with the *bam-Gal4* driver at 25°C.

| Crosses                                                                 | Average Number of Progeny at 25 °C |
|-------------------------------------------------------------------------|------------------------------------|
| ♀ COX4-ORF/ <i>bam-Gal4</i> x ♂ <i>w<sup>1118</sup></i>                 | 25 $\pm$ 1.73                      |
| ♂ COX4-ORF/ <i>bam-Gal4</i> x ♀ <i>w<sup>1118</sup></i>                 | 24.7 $\pm$ 3.28                    |
| ♀ COX4L-ORF/ <i>bam-Gal4</i> x ♂ <i>w<sup>1118</sup></i>                | 24 $\pm$ 5.55                      |
| ♂ COX4L-ORF/ <i>bam-Gal4</i> x ♀ <i>w<sup>1118</sup></i>                | 12 $\pm$ 0.57                      |
| ♀ <i>w<sup>1118</sup></i> / <i>bam-Gal4</i> x ♂ <i>w<sup>1118</sup></i> | 25.3 $\pm$ 1.2                     |
| ♂ <i>w<sup>1118</sup></i> / <i>bam-Gal4</i> x ♀ <i>w<sup>1118</sup></i> | 23.3 $\pm$ 3.18                    |
| Crosses                                                                 | Average Number of Progeny at 25 °C |
| ♀ COX4-ORF/ <i>Act-Gal4</i> x ♂ <i>w<sup>1118</sup></i>                 | 25 $\pm$ 1.73                      |
| ♂ COX4-ORF/ <i>Act-Gal4</i> x ♀ <i>w<sup>1118</sup></i>                 | 25.3 $\pm$ 4.05                    |
| ♀ COX4L-ORF/ <i>Act-Gal4</i> x ♂ <i>w<sup>1118</sup></i>                | 27.3 $\pm$ 2.02                    |
| ♂ COX4L-ORF/ <i>Act-Gal4</i> x ♀ <i>w<sup>1118</sup></i>                | 29.3 $\pm$ 1.45                    |
| ♀ <i>w<sup>1118</sup></i> / <i>Act-Gal4</i> x ♂ <i>w<sup>1118</sup></i> | 25.3 $\pm$ 3.84                    |
| ♂ <i>w<sup>1118</sup></i> / <i>Act-Gal4</i> x ♀ <i>w<sup>1118</sup></i> | 26.3 $\pm$ 1.2                     |

## References

1. Clark, N.L.; Alani, E.; Aquadro, C.F. Evolutionary rate covariation reveals shared functionality and coexpression of genes. *Genome research* **2012**, *22*, 714-720, doi:10.1101/gr.132647.111.
2. Clark, N.L.; Alani, E.; Aquadro, C.F. Evolutionary rate covariation in meiotic proteins results from fluctuating evolutionary pressure in yeasts and mammals. *Genetics* **2013**, *193*, 529-538, doi:10.1534/genetics.112.145979.
3. Findlay, G.D.; Sitnik, J.L.; Wang, W.; Aquadro, C.F.; Clark, N.L.; Wolfner, M.F. Evolutionary rate covariation identifies new members of a protein network required for *Drosophila melanogaster* female post-mating responses. *PLoS genetics* **2014**, *10*, e1004108, doi:10.1371/journal.pgen.1004108.
4. Wasbrough, E.R.; Dorus, S.; Hester, S.; Howard-Murkin, J.; Lilley, K.; Wilkin, E.; Polpitiya, A.; Petritis, K.; Karr, T.L. The *Drosophila melanogaster* sperm proteome-II (DmSP-II). *J Proteomics* **2010**, *73*, 2171-2185, doi:10.1016/j.jprot.2010.09.002.
5. Mahadevaraju, S.; Fear, J.M.; Akeju, M.; Galletta, B.J.; Pinheiro, M.; Avelino, C.C.; Cabral-de-Mello, D.C.; Conlon, K.; Dell'Orso, S.; Demere, Z.; et al. Dynamic sex chromosome expression in *Drosophila* male germ cells. *Nat Commun* **2021**, *12*, 892, doi:10.1038/s41467-021-20897-y.

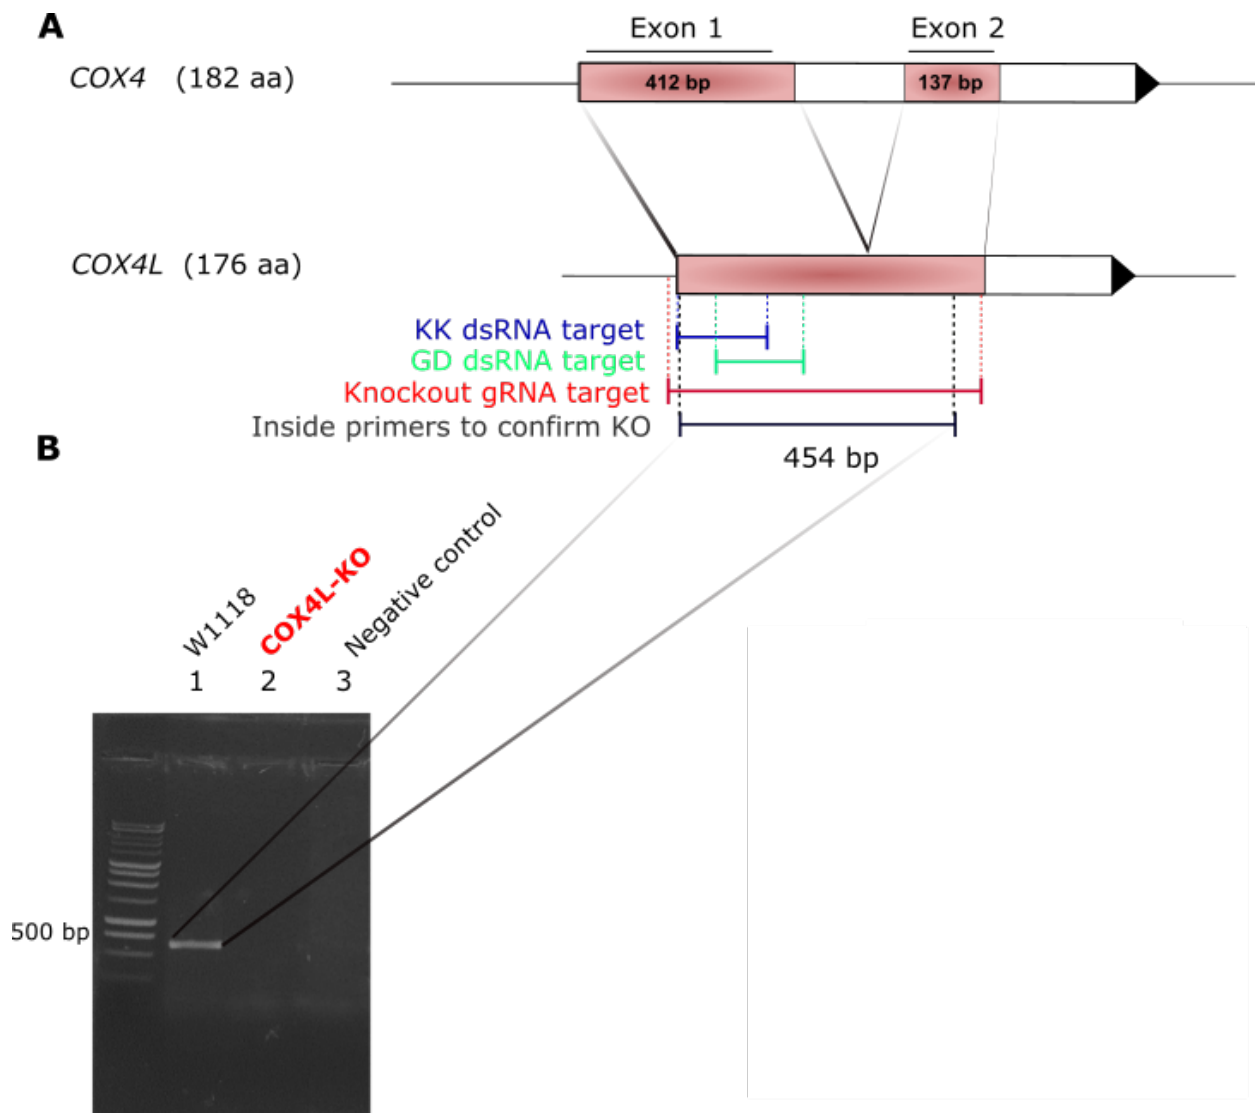

**Supplementary Figure S1.** (A) *COX4* and *COX4L* gene structures. *COX4L* is an RNA-mediated duplication of *COX4*, which is only six aa shorter than its parental protein. The regions of dsRNA expressed in the RNAi knockdowns using the KK and GD lines are shown. The *COX4L*-KO targeted region is shown. The location of the primers for PCR within *COX4L* is depicted. (B) The lack of a PCR amplification for *COX4L*-KO homozygotes is shown, confirming the removal of *COX4L* from the genome.



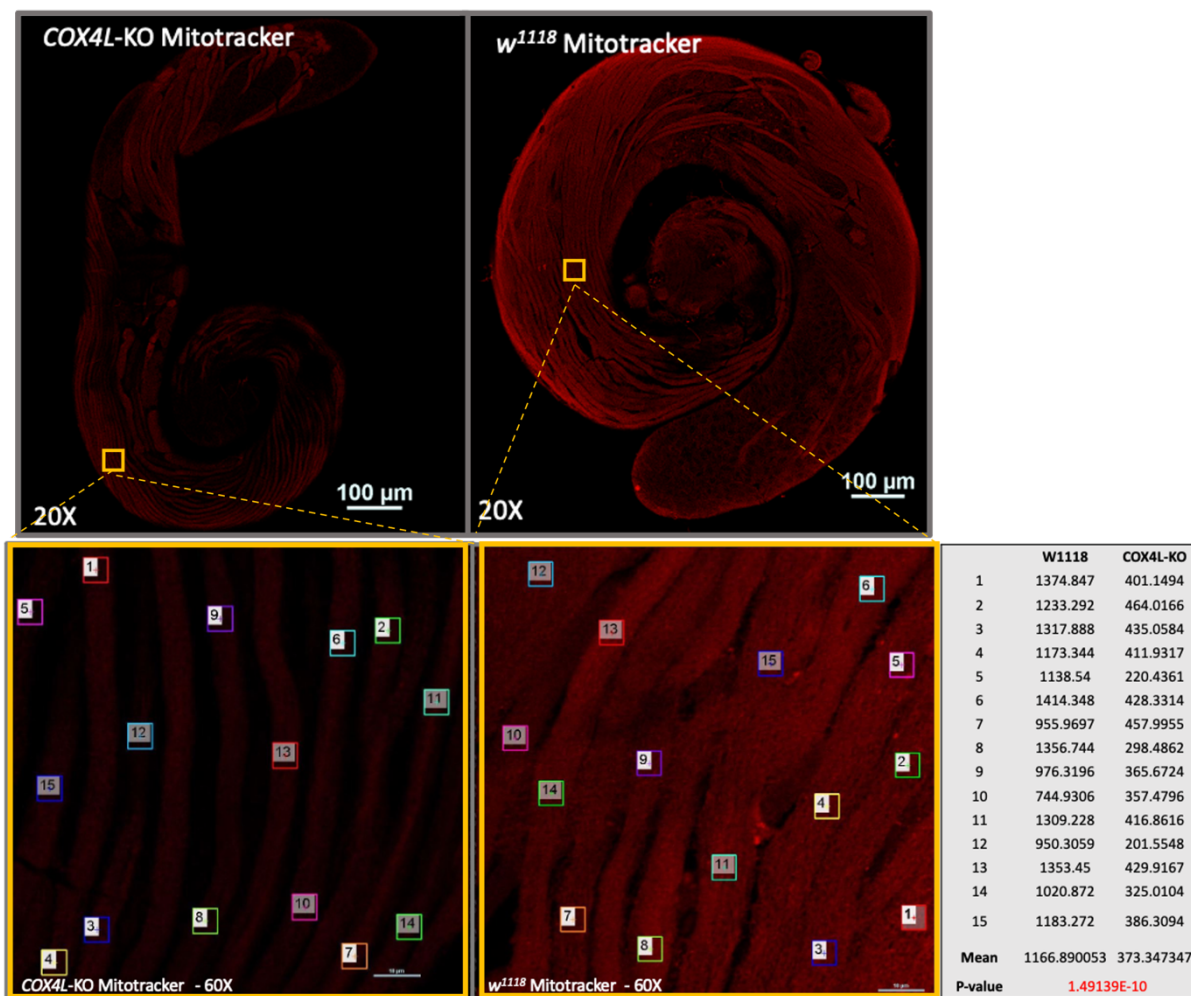

**Supplementary Figure S2.** *COX4L-KO* and *w<sup>1118</sup>* sperm bundles stained with MitoTracker™ Deep Red FM are shown. The confocal microscope at UT Arlington (Nikon Eclipse Ti2 laser scanning confocal microscope) was used for imaging. NIS-Elements imaging software (version 5.20.00) was used for image visualization. The fluorescence observed at 60X magnification on the sperm bundles was quantified by the NIS-Elements imaging software by choosing 15 random equally sized regions of interest, and the values were compared between *COX4L-KO* and the line of control (*w<sup>1118</sup>*). A performed t-test shows statistically significant differences in the observed glowing between these two strains. We interpret this as a reduction in the mitochondria membrane potential and a change in the morphology of the sperm bundles (*COX4L-KO* testes sperm bundles appear to be thinner).

a. COX4 conserved

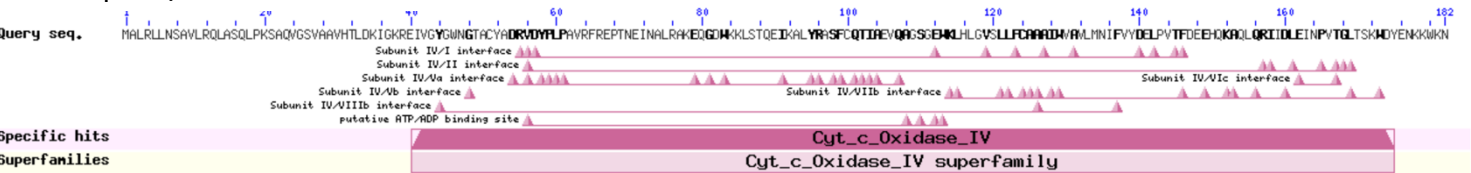

b. COX4L conserved domains

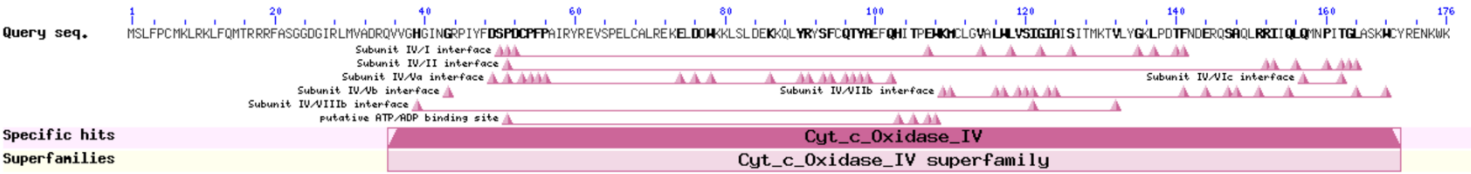

Supplementary Figure S3. COX4 (a) and COX4L (b) conserved domain analysis.



>NP\_001260612.1\_Drosophilamelanogaster\_COX4

MALRLLNSAVLRQLASQLPKSAQVGSVAAVHTLDKIGKREIVGYGWNGTACYADRV  
DYPLPA  
VRFREPTNEINALRAKEEQGDWKKLSTQEIKALYRASFCQTIAEVQAGSGEWKLHLGV  
SLLFCA  
AAIWVAVLMNIFVYDELPVTFDEEHQKAQLQRIIDLEINPVTGLTSKWDYENKKWKN

>XP\_002039171.1\_Drosophila\_sechellia\_COX4

MALRLINSAVLRQLASQLPKSAQVGSVAAVHTLDKIGKREIVGYGWNGTACYADRV  
DYPLPAV  
RFREPTNEINALRAKEEQGDWKKLSTQEIKALYRASFCQTIAEVQAGSGEWKLHLGIA  
LLFSAAA  
IWWAVLMNLFVYDELPVTFDEEHQKAQLQRIIDLEINPVTGLTSKWDYENKKWKN

>XP\_002090761.1\_Drosophila\_yakuba\_COX4

MALRLLNSAVLRQLASQLPKSAQVGSVAAVHTLDKIGKREIVGYGWNGTACYADRV  
DYPLPA  
VRFREPTNEINALRAKEEQGDWKKLSPQEIKALYRASFCQTIAEVQAGSGEWKLHLGV  
ALLFTA  
AAIWVAVLMNIFVYDELPVTFDEEHQKAQLQRIIDLEINPVTGLTSKWDYENKKWKN

>ABM88269.1\_Drosophila\_simulans\_COX4

MALRLINSAVLRQLASQLPKSAQVGSVAAVHTLDKIGKREIVGYGWNGTACYADRV  
DYPLPAV  
RFREPTNEINALRAKEEQGDWKKLSTQEIKALYRASFCQTIAEVQAGSGEWKLHLGIA  
LLFSAAA  
IWWAVLMNLFVYDELPVTFDEEHQKAQLQRIIDLEMNPVTGLTSKWDYENKKWKN

>XP\_015011971.1\_Drosophila\_erecta\_COX4

MALRLLNSAVLRQLASQLPKSAQVGSVAAVHTLDKIGKREIVGYGWNGTACYADRV  
DYPLPA  
VRFREPTNEINALRAKEEQGDWKKLSPQEIKALYRASFCQTIAEVQAGSGEWKLHLGV  
ALLFTA  
AAIWVAVLMNLFVYDELPVTFDEEHQKAQLQRIIDLEINPVTGLTSKWDYENKKWKN

>AAP88318.1\_Drosophila\_mauritiana\_COX4

MAXRLNSAVLRQLASQLPKSAQVGSVAHVHTLDKIGKREIVGYGWNGTACYADRVDPYPLPAV  
RFREPTNEINALRAKEQGDWKKLSTQEIKALYRASFCQTIAEVQAGSGEWKLHLGIALLFSA  
IWWAVLMNLFVYDELPVTFDEEHQKAQLQRIIDXEINPVTGLTSKWDYENKKWKX

>XP\_017081521.1\_Drosophila\_eugracilis\_COX4

MALRLLNSAVLRQLASQLPKSAQVGSVASVHTLDKIGKREIVGYGWNGTACYADRVDPYPLPA  
VRFREPTNEINALRTKEQGDWKKLSQQEIKALYRASFCQTIAEVQAGTGEWKLHLGIALLFSA  
AIWWAVLMNLFVYDELPVTFDEEHQKAQLKRIIDLEINPVTGLTSKWDYENKKWKN

>XP\_017056702.1\_Drosophila\_ficusphila\_COX4

MALRLLNSAVLRQLASQLPKSAQVGSVAHVHTLDKIGKREIVGYGWNGTACYADRVDPYPLPAV  
RFREPTNEINALRTKEQGDWKKLSKEEIKALYRASFCQTIAEVQAGTGEWKLHLGVALLFSAA  
AIWWAVLMNLFVYDELPVTFDEEHQKAQLKRIIDLEMNPVTGLTSKWDYENNKWKN

>XP\_016962286.1\_Drosophila\_biarmipes\_COX4

MALRLLNSAVLRQLAAQLPKNAQVGSVAHVHTLDKIGKREIVGYGWNGTACYADRVDPYPLPA  
VRFREPTNEINALRTKEQGDWKKLSPEEIKALYRASFCQTIAEVQASSGEWKLHLGIAFLFSAA  
AIWIAVLMNLFVYDELPVTFDEEHQKAQLQRIIDLEINPVTGLTSKWDYENKKWKN

>XP\_016924725.1\_Drosophila\_suzukii\_COX4

MALRLINSAVLRRLASQLPKNAQVGSVAHVHTLDKIGKREIVGYGWNGTACYADRVDPYPLPAV  
RFREPTNEINALRTKEQGDWKKLSPEEIKALYRASFCQTIAEVQAGTGEWKLHLGIALLFSA  
WVAILMNLFFVYDELPVTFDEEHQKAQLQRIIDLEMNPVTGLTSKWDYENKKWKN

>XP\_017117177.1\_Drosophila\_elegans\_COX4

MALRLINSAVLRQLASQLPKSAQVGSVGVHTLDKIGKREIVGYGWNGTACYADRVDPYMPA  
VRFREPNNEINALRTKEQGDWKKLSREEIKALYRASFCQTIAEVQAGTGEWKLHLGVALLFSA  
AAIWVAVLMNLFFVYDELPVTFDEEHQKAQLKRIIDLEMNPVTGLTSKWDYENNKWKN

>XP\_017154168.1\_Drosophila\_miranda\_COX4

MALRLINHAMLRLQLAAQLPRNAQVGSVASVHTLDKIGKREVVGYGWNGTACYADRVDPYMP  
AVRFREPNNEINALRAKEQGDWKKLSPQEIKVLYRASFCQTIAEVQAGTGEWKQHLGVSLFC  
AGAIWIAILMNLFFVYDELPVTFDEEHQKAQLKRIIDLEMNPVTGLTSKWDYENKQWKN

>XP\_015036723.1\_Drosophila\_pseudoobscura\_COX4

MALRLINHAMLRLQLAAQLPRNAQVGSVASVHTLDKIGKREVVGYGWNGTACYADRVDPYMP  
AVRFREPNNEINALRAKEQGDWKKLSPQEIKALYRASFCQTIAEVQAGTGEWKQHLGVSLFC  
AGAIWIAILMNLFFVYDELPVTFDEEHQKAQLKRIIDLEMNPVTGLTSKWDYETKQWKN

>XP\_002021764.2\_Drosophila\_persimilis\_COX4

MPQLNNTIDSLCNCDRMALRLINHAMLRLQLAAQLPRNAQVGSVASVHTLDKIGKREVVG  
WNGTACYADRVDPYMPAVRFREPNNEINALRAKEQGDWKKLSPQEIKALYRASFCQTIAEVQ  
AGTGEWKQHLGVSLFCAGAIWIAILMNLFFVYDELPVTFDEEHQKAQLKRIIDLEMNPVTGLTS  
KWDYETKQWKN

>XP\_001962444.1\_Drosophila\_ananassae\_COX4

MALRLINNAVLRQLVAQLPKNAQVGSVAGVHTLDKIGKREIVGFGWNGTACYADRVDPYPLPAV  
RFREANNEINALRTKEQGDWKKLSPQEIKALYRASFCQTIAEVQAGTGEWKMH LGVGLLFTAA  
AIWVAVLMNLFVYDELPVTFDEEHQKAQLKRIIDLEINPVTGLTSKWDYENNKWKN

>XP\_022232103.1\_Drosophila\_obscura\_COX4

MALRLINSAVFRQLVAQLPRNAQVGSVASVHTLDKIGKREVVGYGWNGTACYADRVDPYMPA  
VRFREPNNEINALRAKEQGDWKKLSPQEIKALYRASFCQTIVEVQAGSGEWKQHLGVSLFCA  
GAIWIAILMNLFVYDELPITFDDEHQKAQLKRIIDLEMNPVTGLTSNWDYEKKQWKN

>XP\_023031397.1\_Drosophila\_willistoni\_COX4

MALRLINSAVFRQLVNQLPRNAQVGSVASVHTLDKIGKREIVGYGWNGTACYADRVDPYPLPAI  
RFREANNEINALRAKEQGDWKKLSPQEIKALYRASFCQTIAEVQAPTGEWKMH LGVGLIFTAA  
AIWIAVLMNLFVYDELPITFDDEHQKAQLKRIIDLEINPVTGLTSKWDYENNKWKN

>XP\_002051184.1\_Drosophila\_virilis\_COX4

MALRLINNALRRQLAAQLPRNAQVGSVASIHTLDKIGKREIVGFGWNGTACYADRVDPYMPAV  
VRFREPNNEINALRTKEQGDWKKLSPQEIKALYRASFCQTIAEVQASTGEWKMH LGVGLIFTAA  
AIWIAVLMNLFVYDELPITFDDEHQKAQLKRMIDLEINPVTGLTSKWDYENNKWKN

>XP\_002003948.1\_Drosophila\_mojavensis\_COX4

MALRLINSALRRQLAAQLPHNAQVGSVASVHTLDKIGKREVVGFGWNGTACYADRADYPMMPA  
VRFREPNNEITALRTKEQGDWKKLSPQEIKALYRASFCQTIAEVQAGTGEWKMH LGIGLIFTAA  
AIWIAVLMNLFVYDELPVTFDEEHQKAQLKRMIDLEINPVTGLTSKWDYENNKWKN

>XP\_030381258.1\_Scaptodrosophila\_lebanonensis\_COX4

MALRLINHALRRQLAAQLPRNAQVGSVASVHTLDKIGKREVVGYGWNGTASYADRVDYPLPPI  
RFREPNNEINALRVKEQGDWKKLSPQEIKALYRASFCQTIAEVQAGTGEWKMH LGIGLLFTSA  
AIWIAILMNLFVYDELPVTFDEEHQKAQLKRMLDLEVNPITGLSSKWDYENNKWKN

>XP\_005179417.1\_Musca\_domestica\_COX4

MALRVLNMALRRQLAAQLPRTSQVGSVASVHTLDKIGKREIVGYGWNGTACYVDRVDYPMPP  
VRFREPTNEINNLRKEKEKGDWKKLSVEEKKALYRASFCQTLAELKAPSGEWKLHLGMGLLFA  
SAAIWVAILMNLFVYDELPASFDEEHQKAQLKRMLDLEINPVAGLSSKWDYENKRWKN

>XP\_023290998.1\_Lucilia\_cuprina\_COX4

MALRVLNMALRRQLAQLPRNAQVGSVASVHTLDKIGKREIVGYGWNGTACYADRVDYPMMPAI  
RFREATNEINALREKEKQDWKKLSNEEKKALYRASFCQTFAEMKAGTGEWKMH LGMGLIFTT  
LALWVAIFMNTYVYDEMPVTFDEEHQKAQLKRMLDLEMNPVTGISSKWDYENKRWK

>XP\_014101397.1\_Bactrocera\_oleae\_COX4

MALRGFSMSMQRQLLKQLLKNTQSGSIASVHTLDKIGNREIVGFGWNGTACYADRTDYPMMPA  
IRFREPTNEIKALREKEKQDWKKLSPEEIKVLYRASFCQTFAEIQAPTGEWKQH LGISFIFIGLAI  
WIAVLMNLFVYDELPVTFDDEHKKAQLKRMIDLEVNPVTGLTSKWDYENKKWK



>XP\_037883030.1\_Glossina\_fuscipes\_COX4

MALRVLDMALRRQLAAQVVRC PQIGSVASVHTLDKIGKREIVGYGWNGTACYYDRADYMPMA  
VRFREPTNEINNLRQKEKGDWKKMSIDEKKALYRASFCQTFAEIQA PTGEFKQHFGVGLLFTA  
MAIWVAIFMNL FVYDEMPVTFDEEHKKAQLKRMIDLEMNPVTGLASKWDYQNNRWK

>XP\_004534967.1\_Ceratit is\_capitata\_COX4

MALRGISVSMQRQLFKQLLKT AQSGSVASVHTLDKIGNREIVGHGWNGTACYADRTDYPMPA  
IRFREVNNEIKALREKEKQDWKKLSHEEIKALYRASFCQTFAEIQA PTGEWKQHLGMGLIFTSL  
AIWIAILMNLFVYDEL PVTFDEEHQKAQLRRMIDLEVNPVTGLTSKWDHENKKWK

>XP\_036321723.1\_Rhagoletis\_pomonella\_COX4

MALRGFSLPMQRQLLKQMIKT VQNGSVASVHTLDKIGNREIVGHGLNGSACYVDRTDYPMPAI  
RFREPTNEIKALREKEKQDWKKLSHQEIKALYRASFCQTFAEIQA PTGEWKQHVGISLIFTGLAI  
WIAILMNLFVYDEL PVTFDEEHQKAQLKRMIDLEVNPVTGLASKWDYENNKWK

>XP\_011182108.1\_Zeugodacus\_cucurbitae\_COX4

MALRGFSMSMQRQLLKQLLKNT QSGSIA SIHTLDKIGNREIVGYGWNGTACYADRTDYPMPAI  
RFREPNNEIKALREKEKQDWKKLSPEEVKALYRASFCQTFAEIQA PTGEWKQHLGIGFIFISMA  
IWI AVL MNLYVYDEMPVTFDDEH KKAQLKRMLDLEVNPVTGLTSKWDHENKKWK

>XP\_029708249.1\_Aedes\_albopictus\_COX4

MANVNLASVVL RNALRQKMGRFSHDMIAQKIGKREVVGHWNGLPVYADRVDYPMPAIRF  
KEVTPDVMALREKEKGDWKKLSMQEKKALYRASFCQT FSEIKYPTGEWKLSVGFG LIVLSMSL  
ATMMLMKAFVYDDIPVTFDDEH KKAQLKRMLDLGVGNITGLSSKWDYENNKWK

>XP\_035911113.1\_Anopheles\_stephensi\_COX4

MANVNLASVVLARNALRTKMGRQAHDMSQKIGKREVVGHWNGLPVYADRVDYPMPAIRFK  
ENTRDVLALREKEKGDWKKLSVQEKKALYRASFCQTFAEMKHPTGEWKACLGAALIATSMALI  
GMMLLKTFVYDPIPETFDEEHQKAQLKRMLDLNINPIHGVSSKWDYENNKWK

>XP\_039447568.1\_Culex\_pipiens\_pallens\_COX4

MANVNVAQVVLARNALRTKLGSVRYASSDMMMLQKIGKREVVGHWNGMPVYADRVDYDFPFAI  
RFKEPTPDVLALREKEKGCWKKLSVQEKKALYRASFCQTFSEMKYPSGEWKMLGLFGLIAIS  
MSITCMLLMKAFVYEKIPETFDDEHQKAQLKRMLDLGVGPVTGLSSKWDYDNNKWK

>XP\_314839.4\_Anopheles\_gambiae\_partial\_COX4

LKTETMANVNLASVVLRTALRAKIGTRQSHDMITQKIGKREVVGHWNGLPVYADRVDYPMP  
AIRFKENTRDVLALREKEKGDWKKMSVQEKKALYRASFCQTFAEMKHPTGEWKACLGAALIA  
ASMSLIGMMLLKAFVYEPIPETFDEEHQKAQLKRMLDLNINPIHGVSSKWDYDNNKWK

>XP\_013144802.1\_Papilio\_polytes\_COX4

MANYLLRRAIIDAIRVPVGTRASSELAKIGNREWVGYGNGQPTYVDRPDFPLPAVRFRPDTP  
DVKVLREKERGDWRKLTLEEKALYRASFCQTFAEFQAPTGEWKGVVGSLSLVFISLSLWVYM  
GMKLFVYSPLPASFDEDAQKAQLKRMLDLKVNPIDGLSSKWDYENNRWK

>XP\_037965467.1\_Plutella\_xylostella\_COX4

MANLLMRRALINAIRVPAGTRASSVNTDLAKVGKREWVCYGFNGQPNYVDRPDYPMPAVRF  
QPETPDIKMLREKEKGDWRKLTMEKKALYRASFCQTFAEFQAPTGEWKGVGTGWALTSLASLS  
VWIYFAMKIFVYSPLPETFDDEHQKAQLKRMLDLKVNPDGLASKWDYENNRWK

>NP\_001073120.1\_Bombyx\_mori\_COX4

MANYLMRRALINAIRVPVCARAGSTGNTELAKIGDREWVGYGFGNGQPNYVDRPDFPLPAIRFR  
EDTPDIKALREKEKGDWRKLTLEEKKTLYRASFCQTFAEFQAPTGEWKGVVGWALVLSSLAA  
WIYMAMKVFVYSPIPDSLSEERQKAQLQRMLDLKVNPIDGLASKWDYENNRWK

>XP\_029177602.1\_Nylanderia\_fulva\_COX4

MAGRLFASRLRPVIQVQRCGLMTLDRVGNRDVVGFGYNGEPTYLDRVDFPCPAIRWKENTP  
DVMALKEKEKGDWKKLSIEKKALYRASFRQTFSEIDAPTGEWKGIIGLSCIFLSAGVWLYLYF  
KVFAYPELPETFSLERRLAQLDRMKKLDMPIDGLCARK

>XP\_012221014.1\_Linepithema\_humile\_COX4

MASRLFASRLRPPIIQKCRIMTVDRIGNRDVVGFGYNGEPVYVDRVDFPCPAIRWKENTPDV  
MALREKEKGDWKKLSVEEKRALYRASFRQTFSEIDAPTGEWKGILGMCMVLISSAIWLFLYFK  
TFAYPELPETFSLERRLAQLDRMKKLDMPIDGLCARK

>XP\_012340029.1\_Apis\_florea\_COX4

MLVAISLFLELGSAKKHTMANKLLLSYLRQSTSMCVRGLSAMQFPNKIGNRDVVGNGWNGEE  
AYLDRSDFPLPAIRFKANTPDIMALREKEKGDWKKLSIEKKILYRASFRQTFSEFLAPTGEWR  
GHIGIALIGVAFSLWIYIFLKIYALPPLPESFNEENRLAQLERMKLLQVNPIDGISSKN

>KYN28998.1\_Trachymyrmex\_cornetzi\_COX4

MTMDKVGNRDVVGFGYNGEPAYLDRVDFPYPAIRWKENTPDIMALREKEKGDWKKLSIEEKK  
ILYRASFRQTFSEMDAPTGEWKILGMSLLITSAGIWLYLYFKAFAYPPLPETFSLERRLAQLDR  
MKKLDMPIDGLCARK

>NP\_001165811.1\_Nasonia\_vitripennis\_COX4

MASRALTTFLRSAAVQAQTRSVYTIQNKIGNREVCHGMNSEPIYIDTTDFPMPAIRYKEVTPDI  
QALREKEKGDWKKLSVEDKKALYRASFRQTF AEMEAPSGDWKSVIGLSLVGISISMWLFVWT  
KHVYVPPLPSSLSEENQLAQLERMKLLDMQPITGLPGTKK

>AAH62437.1\_Homo\_sapiens\_COX4

MLTTRVFSLVGKRAISTSVCVRAHESVVKSEDFSLPAYMDRRDHPLPEVAHVKHLSASQKALK  
EKEKASWSSLMSDEKVELYRIKFKEFAEMNRGSNEWKTVVGGAMFFIGFTALVIMWQKHYY  
YGPLPQSFDKEWVAKQTKRMLDMKVNPIQGLASKWDYEKNEWKK

>NP\_001238844.1\_Pan\_troglodytes\_COX4

MLATRVFSLVGKRAISTSVCVRAHESVVKSEDFSLPAYMDRRDHPLPEVAHVKHLSASQKALK  
EKEKASWSSLMSDEKVELYRIKFKEFAEMNRGSNEWKTVVGGAMFFIGFTALVIMWQKHYY  
YGPLPQSFDKEWVAKQTKRMLDMKVNPIQGLASKWDYEKNEWKK

>NP\_610168.1\_Drosophila\_melanogaster\_COX4L

MSLFPCMKLRLKFQMTRRRFASGGDGIRLMVADRQVVGHGINGRPIYFDSPDCPFPARYRE  
VSPELCALREKELDDWKKLSLDEKKQLYRYSFCQTYAEFQHITPEWKMCGLGVALWLVSIGIAIS  
ITMKTVLYGKLPDTFNDRQSAQLRRIIQLQMNPIGLASKWCYRENKWK

>XP\_033155789.1\_Drosophila\_mauritiana\_COX4L

MSLFPCMKLRLKLFQMTRRRFASGGDGIRLMVADRQVVGHGINGRPIYFDSPDCPFPAIRYRE  
VTPELCALCEKELDDWKKLSLDEKKQLYRYSFCQTYAEFQHFTPEWKLCLGVALWLVSIGIAIS  
ISMKTVLYGKLPETFNEERQSAQLRRIIQLQMNPIITGIASQWCYRENKWK

>ABM88275.1\_Drosophila\_simulans\_COX4L

MSLFPCMKLRLKLFQMTRRRFASGGDGIRLMVADRQVVGHGINGRPIYFDSPDCPFPAIRYRE  
VTPELCALCEKELDDWKKLSLDEKKQLYRYSFCQTYAEFQHFTPEWKLCLGVALWLVSIGIAIS  
ISMKTVLYGKLPTDFSEERQSAQLRRIIQLQMNPIITGIASQWCYRENKWK

>XP\_002044619.1\_Drosophila\_sechellia\_COX4L

MSLFPCMKLRTLFLQMTRRRFASGGDGIRLMVADRQVVGHGINGRPIYFDSPDCPFPAIRYREV  
TPELCALCEKELDDWKKLSLDEKKQLYRYSFCQTYAEFQHFTPEWKLCLGVALWLVSIGIAISI  
SMKTVIYGKLPETFNEERQSAQLRRIIQLQMNPIITGIASQWCYRENKWK

>EDX00443.1\_Drosophila\_yakuba\_COX4L

MNLFPCCLKLRKLYQMTRRRFASGGDSIRLMVADREVVGHHINGRPIYFDSPDCPFPAIRYQEV  
NSKLCALREKELDDWKNLSLDEKKQLYRHSFCQTYAEFQHFTPEWKICLAVALWLVSIGIAISI  
SMKTMLYGKLPQTFDDERQSAQLRRIIQLQMNPIITGLSSKWCYQENKWK

>XP\_001971288.1\_Drosophila\_erecta\_COX4L

MSLIPCLRGRNLFQMTRRGFASGGDLIRLMVADREVVG YGINGRPIYFDSPDCPFP AIRYREV  
NPELCALREKELDDWKKLSLDEKKQLYRHSFCQTYAEFQHFTPEWKLCLGVALWVVALGIGIS  
ISMKTLVYRKLPDTFDDEHQSAQLRRIIQLQMN PITGISSKW CYHENKWK

>XP\_016937064.1\_Drosophila\_suzukii\_COX4L

MSALRLIPRNLSQLTTPTRMAMMGRRFASGGDGVRL LIGDREVVG YGINGRPLYFDSPDCPF  
PAIRYREVTPELCAVREKELGDWKKLSLDDKKLLYRHSFCQTYAEFQHF SPEWKICLGVALWL  
VAIGMGISIAMKAKLYGELPETFDDEHQSAQLRRIIQLQMN PITGISSKW CYHENKWK

>XP\_017114377.1\_Drosophila\_elegans\_COX4L

MSALRLIPRGNAGGNLSQIMTLSQMGRRLASGGDGIRLMVGEREVVG YGINGRPIYFDSQDC  
PFP AIRYREVTPELCAIREKELGDWKKLSLDDKKRLYRHSFCQTFVEFQHFTPEWKICLGVAL  
WLVALGLSISMVLKTKMYGQLPDTFDEDRRSAQLRRMIQLQMN PITGISSKW CYEENKWK SQ  
LH

>XP\_017073706.1\_Drosophila\_eugracilis\_COX4L

MSALRLIPRFLPRNLGQMPIVGRRFASGGDGIRLMVGDREMVGYGINGRPIYFDTADCPFPAI  
RFREVTPELCAIREKELDDWKSM SLDDKKQLYRHSFCQTFAEFQHV SPEWKVCVGTALWFLA  
LGICISMILKAKMYPELPDTFSDDRQSAQLRRIIQLQMN PITGLSSKW CYHENKWK

>XP\_016954589.1\_Drosophila\_biarmipes\_COX4L

MSALRLIPRNLSQLATPTRMMIGRRFASGGDGIRLLIGDREVVG YGINGRPLYFDSPDCPFP AI  
RYREVTPELCAVREKELGDWKKLSLDDKKLLYRHSFCQTYAEFQHF SPEWKICLGVALWLVA  
LGMGITIVLKAKMYGELPETFDDVHQSAQLRRMIQLQMN PITGISSKW CYHENKWK

>XP\_001966770.1\_Drosophila\_ananassae\_COX4L

MSALRMLPRARPMHLDSSVVMGLRFASGDQTRIMSGDREVVG YGINGRPIYFDSQDCPFPAI  
RFRELTPEVCAIREKELGDWKKLSLCEKKMLYRHSFCQTYAEFQKFTP DWKLV LGLGLWSLAI  
GCAITVISKLNLYNDPPETFEEDRRSAQLRRIIQLQMN PITGLSSKWCYERNQWK

>XP\_022228406.1\_Drosophila\_obscura\_COX4L

MSIIRALSLHLHQQCHRILPQQWALLAMVRRETHHDGTRLMSGDREVVG YGINGNPIYIDCVE  
FPFPAIRYREVTAELCAAREKELGDWNSLSLQEKKLLYRHSFCQTYAEFQHFTP DWK LAMGV  
GFWSAAGLLISLSYYFKLYGPVPETYAEDRRQAQLRRIIQLQMN PITGLSSKWCYHTNKWK

>XP\_002064201.1\_Drosophila\_willistoni\_COX4L

MLSLRPLSKLQTLRSSLCRSGGPAVVAAGSIQRQTHHDGTRLMSGDREVVG YGINGSPIYIDC  
VEFPFPAIRYREVTPELCAVREKELGDWKNSLSEKKSLYRHSFCQTYAEFQHFTP DWK LVLG  
IGFWSIAIGIMMTILYNTKIYDPLPETYDEDRRQAQLRRIIQLQIQPITGISSKWCYHTNTWK

>XP\_002019540.1\_Drosophila\_persimilis\_COX4L

MSVMRALGLRLHNQFQQVLPQRGAVMAMMRRGTHHDGTRLMSGDREVVG YGVNGNPIYID  
CVEFPFPAIRYREVTPELCAVREKELGDWKALSIQDKKLLYRHSFCQTYAEFQHFTP DWK LVI  
GVGFWSAAGLLISLSYYFKLYDPVPETYAEDRRQAQLRRIIQLQMN PITGLSSKWCYHTNKWK

>XP\_002137971.2\_Drosophila\_pseudoobscura\_COX4L

MSVMRALGLRLHNQFQQVLPQRGAVMAMMRRGTHHDGTRLMSGDREVVGYGVNNGNPIYID  
CVEFPFPAIRYREVTAECAVREKELGDWKALSIQDKKLLYRHSFCQTYAEFQHFTPDKLVI  
GVGFWSAAIGLLISLSYYFKLYDPVPETYAEDRRQAQLRRIIQLQMNIPITGLSSKWCYHTNKWK

>XP\_002055279.1\_Drosophila\_virilis\_COX4L

MNSLRCAGLRVSGAAAAAACRPSAGRMTMLPAVMRRLTHHDGTRCMSGEREYVGYGVNNGN  
PIYIDCADFPFPAIRYREVTPEICALREKELSDWKKLSLQEKKALYRHSFCQTYSEFQHFTPDKW  
KL VVGIGLWSIALSILLTAVNLIYDELPETFDEERRQAQLRRIIGLQMQPITGLSSKWDYSQNK  
WK

>XP\_030379296.1\_Scaptodrosophila\_lebanonensis\_COX4L

MSGEREVVGYGVNNGSPIYIDCVEFPFPAIRYKEATPEICALREKELSDWKKLSLQEKKTLYRYS  
FGQTYAEFQHFTPDKWKLIVGIGLWACAIGFLISLSYCAKLYGPFPEEFEEERRQAQLRRIIQLEM  
QPITGLSSKWDYEKNKWK

>XP\_017145095.1\_Drosophila\_miranda\_COX4L

MSVMRALGLRLHNQFQQVLPQRGAVMAMMRRGTHHDGTRLMSGDREVVGYGVNNGNPIYID  
CVEFPFPAIRYREVTAECAVREKELGDWKKLSLKDKKLLYRHSFCQTYAEFQHFTPDKLVI  
GVGCWSVAIGLLLSLSYYFKLYDPVPETFAEDRRQAQLRRIIQLQMNIPITGLSSKWCYHTNKW  
K

>XP\_023292338.1\_Lucilia\_cuprina\_COX4L



MALQICKLISRQQLWKSFKSPPLTISKRATSHDYTNMCGKREYVGFGVNGAPIYVDLVDFPM  
PAIRFQEPSPEICALRKKEEDDWKKLSKDEIKRLYRYSFCRTFAEMKAPTGEWKLHLGIALWA  
CTIGLLFCYTVNVYHQDLPDFTAEDRRQAQLKRIIALEMNPITGLASKWDYEVGDWK

>XP\_014094089.1\_Bactrocera\_oleae\_COX4L

MQSARRPLVRLAGRFGIRLTHSDQVMERIGKREIVGYGWNGSPCYHDRLDYPMFAVRFRFREP  
DPEICALREKETGDWRKLSIDEKKQLYRYSFRKTFAEMKAPTSDWKFSLGVALIAVSIGIWLSQ  
SYAHGIYPEYPETFEEKRRSAQLKRMIALEVNPVTGLASKWDYEKDRWK

>XP\_011189219.1\_Zeugodacus\_cucurbitae\_COX4L

MQSPQNPVRLARRFGIRLTICRQTHSDQVMERVGKREIVGYGWNGSPCYSDRLDYPMFAV  
RFREPDTEICALREKETADWRKLSMDEKKQLYRYSFCKTFAEMKAPTSDWKFSLGAALIAVSI  
GIWLSQSYFHGIYPEYPETFEEKRRSAQLKRMIALEVNPVTGLASKWDYEKDRWK

>XP\_005188663.1\_Musca\_domestica\_COX4L

MALQIEKLIARQGLIKYLNHFRLAPQKRYTSFDFTNTKCGKREYVGFGVNGAPIYCDVAEFPM  
PAIRFREPDATICALREKEKGDWKKLSKEDIKTLYRYSFCQTFAEFKAPTGEWKHHLGVGLWA  
CAIGVVWTAFAVNWYHRDLPDTFDEDRRQAQLKRIIALEMNPIEGISSQWDYEVGDWK
